# Supplementary material for: Entropy differences between hydrides and other elements
Source: Royal Society of Chemistry journal article supplement (doi:10.1039/d0cc07107b), 2021-01-01
Supplement: d0cc07107b1.pdf [file d0cc07107b1.pdf]

## Electronic Supporting Information (ESI)

### **Entropy differences between hydrides and other elements**

Yoshitugu Kojima<sup>\*a</sup> and Masakuni Yamaguchi<sup>b</sup>

<sup>a</sup> Natural Science Center for Basic Research and Development, Hiroshima University,  
1-3-1, Kagamiyama, Higashi-Hiroshima, Hiroshima 739-8530, Japan.

<sup>b</sup> Graduate School of Advanced Sciences of Matter, Hiroshima University, 1-3-1,  
Kagamiyama, Higashi-Hiroshima, Hiroshima 739-8530, Japan.

\* Corresponding author. Tel.: +81 82 424 3904; fax: +81 82 424 5744.

*E-mail address:* [kojimay@hiroshima-u.ac.jp](mailto:kojimay@hiroshima-u.ac.jp)

Table S1 Volume difference, standard entropy difference and standard enthalpy difference.

| Hydrides                                                                  | Volume difference<br>$\Delta V / \text{cm}^3/\text{molH}_2$ | Standard entropy<br>difference<br>$\Delta S / \text{J/KmolH}_2$ | Standard enthalpy<br>difference<br>$\Delta H / \text{kJ/molH}_2$ |
|---------------------------------------------------------------------------|-------------------------------------------------------------|-----------------------------------------------------------------|------------------------------------------------------------------|
| LiH                                                                       | -5.61                                                       | -18.3                                                           | -181                                                             |
| NaH                                                                       | -12.9                                                       | -22.3                                                           | -113                                                             |
| KH                                                                        | -31.8                                                       | -29.3                                                           | -115                                                             |
| RbH                                                                       | -45.2                                                       | -39.3                                                           | -108                                                             |
| CsH                                                                       | -63.6                                                       | -39.3                                                           | -114                                                             |
| MgH <sub>2</sub>                                                          | 4.18                                                        | -1.60                                                           | -75.3                                                            |
| CaH <sub>2</sub>                                                          | -1.26                                                       | -0.30                                                           | -182                                                             |
| SrH <sub>2</sub>                                                          | -5.70                                                       | -25.6                                                           | -198                                                             |
| BaH <sub>2</sub>                                                          | -4.44                                                       | 0.50                                                            | -177                                                             |
| TiH <sub>2</sub>                                                          | 2.68                                                        | -1.30                                                           | -144                                                             |
| ZrH <sub>2</sub>                                                          | 2.66                                                        | -4.30                                                           | -169                                                             |
| NbH <sub>2</sub>                                                          | 2.49                                                        | -2.30                                                           | -40.0                                                            |
| ThH <sub>2</sub>                                                          | 4.80                                                        | -1.30                                                           | -140                                                             |
| UH <sub>3</sub>                                                           | 6.17                                                        | -7.30                                                           | -84.8                                                            |
| LaN <sub>15</sub> H <sub>6</sub><br>(LaN <sub>15</sub> H <sub>6.7</sub> ) | 3.99, 4.20                                                  | 21.7, 22.7                                                      | -30.1, -30.8                                                     |
| TiFeH                                                                     | 3.19                                                        | 24.7                                                            | -28.1                                                            |
| NH <sub>3</sub>                                                           | 10.9, 13.0                                                  | 23.7                                                            | -50.5                                                            |
| MCH                                                                       | 6.92                                                        | 8.7                                                             | -67.5                                                            |
